# Supplementary material for: Live-cell single-molecule tracking highlights requirements for stable Smc5/6 chromatin association in vivo
Source: eLife journal article supplement (doi:10.7554/elife.68579), 2021-04-16

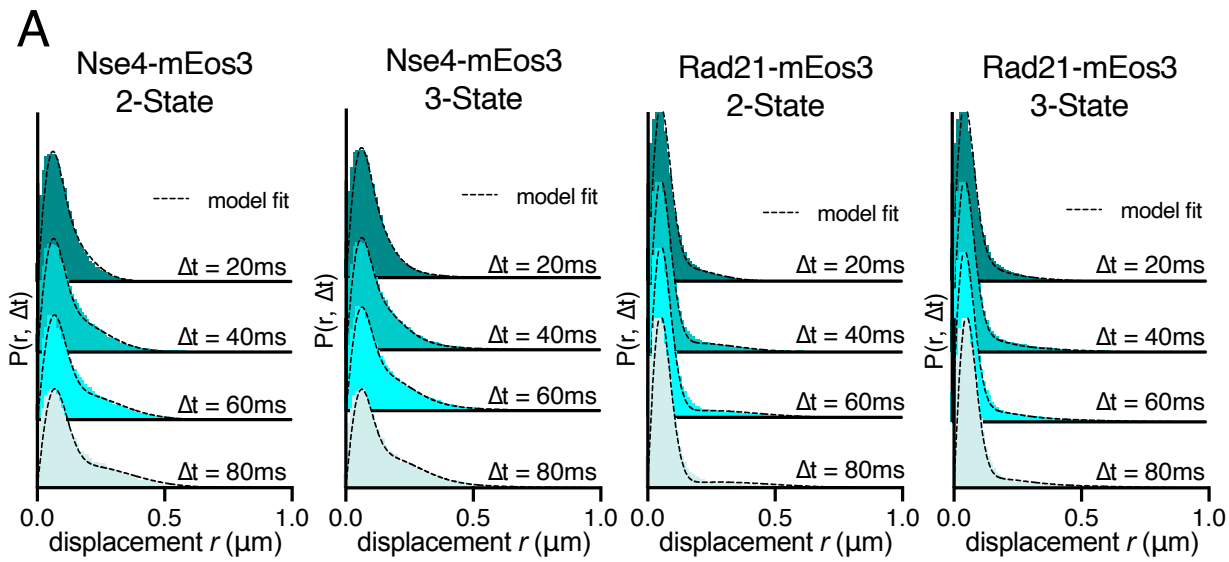

**B**

| Akaike information criterion (AIC) |             |             |
|------------------------------------|-------------|-------------|
| Strain                             | 2-State     | 3-State     |
| Nse4-mEos3                         | -130,870.50 | -144,755.61 |
| Rad21-mEos3                        | -130,529.27 | -135,461.01 |

**C**

| Apparent diffusion coefficient ( $\mu\text{m}^2/\text{s}$ ) |                    |                    |                    |
|-------------------------------------------------------------|--------------------|--------------------|--------------------|
| Strain                                                      | $D_{\text{bound}}$ | $D_{\text{slow}}$  | $D_{\text{fast}}$  |
| Nse4-mEos3                                                  | $0.005 \pm 0.001$  | $0.153 \pm 0.0008$ | $0.694 \pm 0.0068$ |
| Rad21-mEos3                                                 | $0.001 \pm 0.0001$ | n/a                | $0.465 \pm 0.0018$ |

**D**

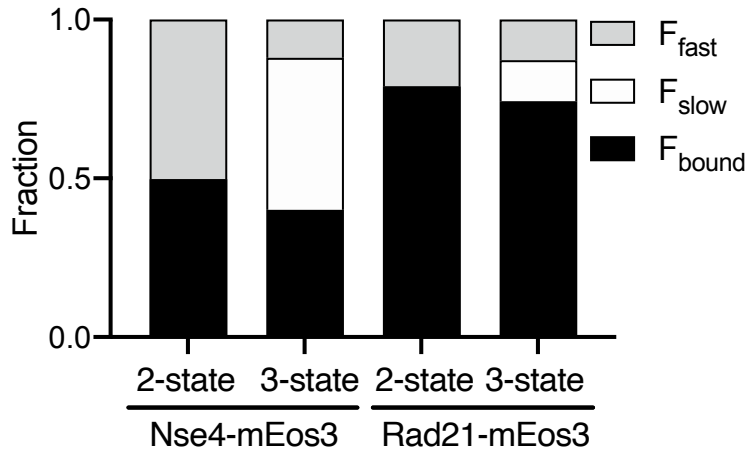

**E**

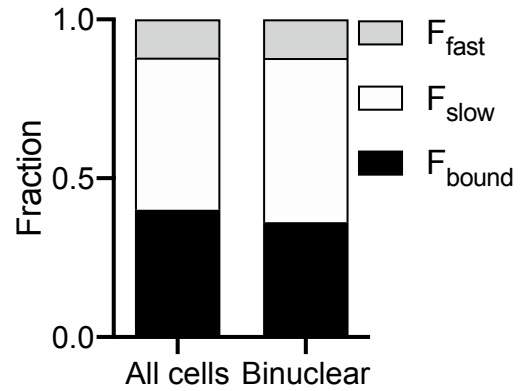

Supplement: supp [file elife-68579-supp-v1.zip]
