# Supplementary material for: Live-cell single-molecule tracking highlights requirements for stable Smc5/6 chromatin association in vivo
Source: eLife journal article supplement (doi:10.7554/elife.68579), 2021-04-16
Supplement: supp [file elife-68579-supp-v1.zip]

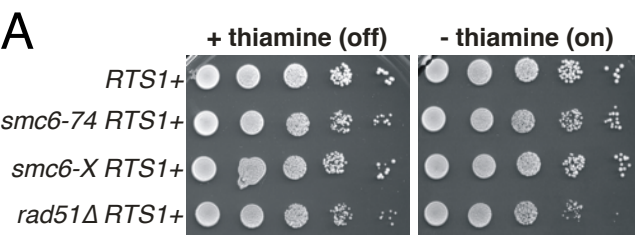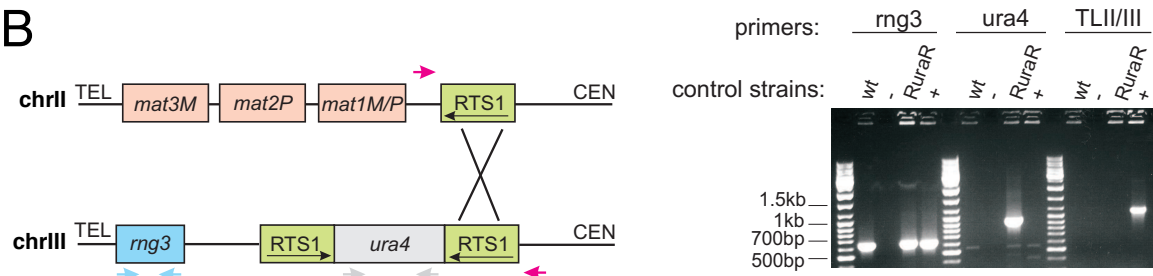

**C**

| Strain         | Translocations |               | <i>ura4</i> deletion | <i>ura4</i> point mutation | <i>ura4</i> truncation | <i>ura4</i> deletion | <i>ura4</i> point mutation | <i>ura4</i> truncation |
|----------------|----------------|---------------|----------------------|----------------------------|------------------------|----------------------|----------------------------|------------------------|
|                | Off            | On            | Off                  |                            |                        | On                   |                            |                        |
| <i>smc6+</i>   | 0/36<br>(0%)   | 1/36<br>(3%)  | 9/36<br>(25%)        | 27/36<br>(75%)             | 0/36<br>(0%)           | 26/36<br>(72%)       | 8/36<br>(22%)              | 2/36<br>(6%)           |
| <i>smc6-74</i> | 2/36<br>(6%)   | 3/36<br>(8%)  | 15/36<br>(42%)       | 21/36<br>(58%)             | 0/36<br>(0%)           | 26/36<br>(72%)       | 9/36<br>(25%)              | 1/36<br>(3%)           |
| <i>smc6-X</i>  | 2/36<br>(6%)   | 6/36<br>(17%) | 14/36<br>(39%)       | 19/36<br>(53%)             | 3/36<br>(8%)           | 31/36<br>(86%)       | 5/36<br>(14%)              | 0/36<br>(0%)           |
