# Supplementary figures and images for: Live-cell single-molecule tracking highlights requirements for stable Smc5/6 chromatin association in vivo
Source: eLife journal article supplement (doi:10.7554/elife.68579), 2021-04-16

**A**

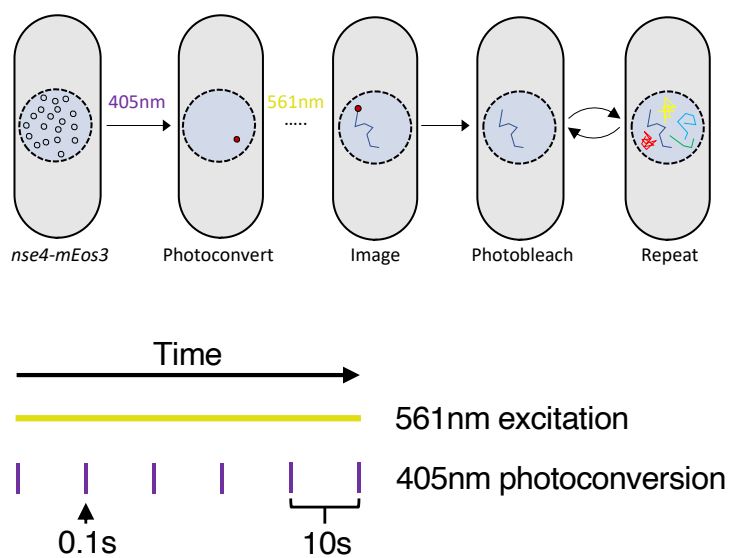

**B**

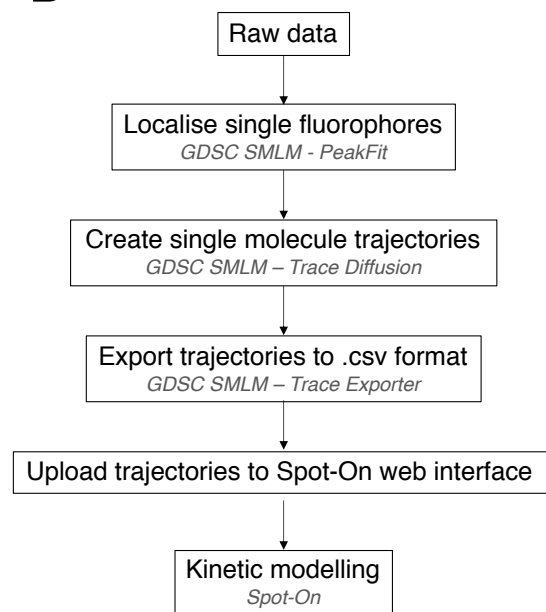

Supplement: supp [file elife-68579-supp-v1.zip]

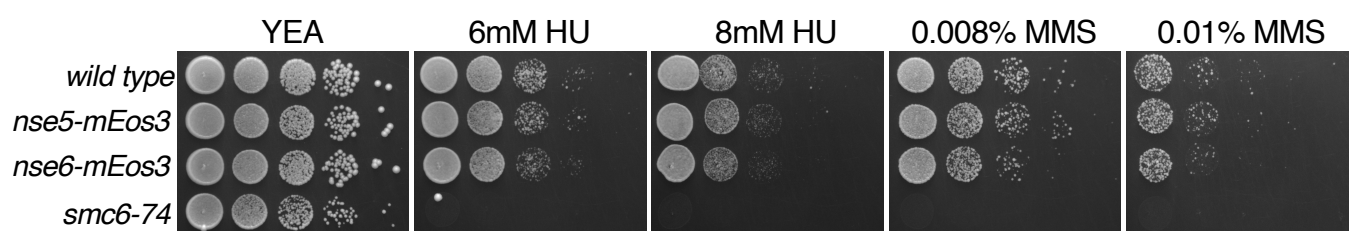

Supplement: supp [file elife-68579-supp-v1.zip]

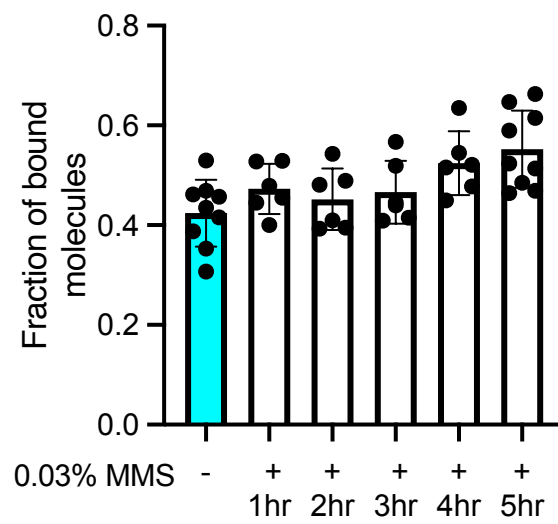

Supplement: supp [file elife-68579-supp-v1.zip]

**A**

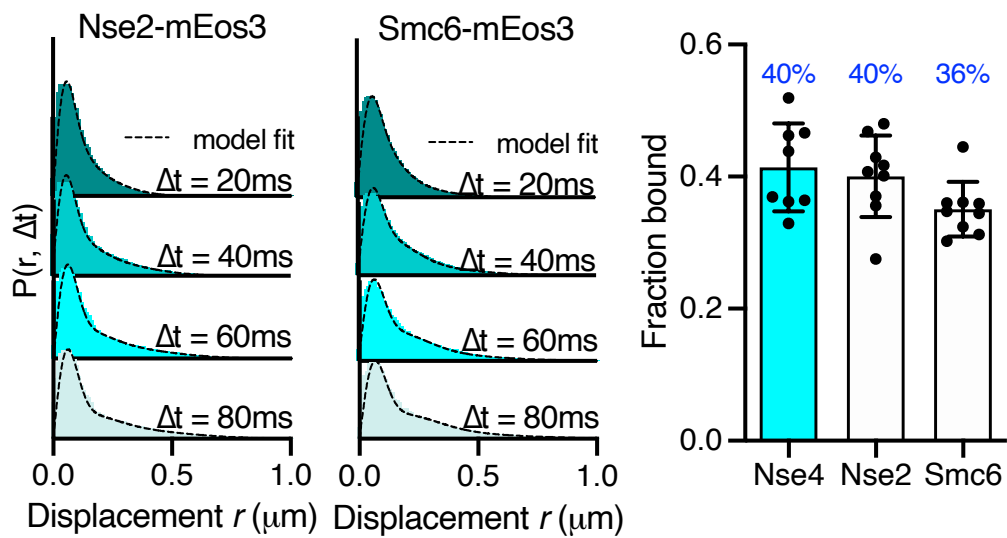

**B**

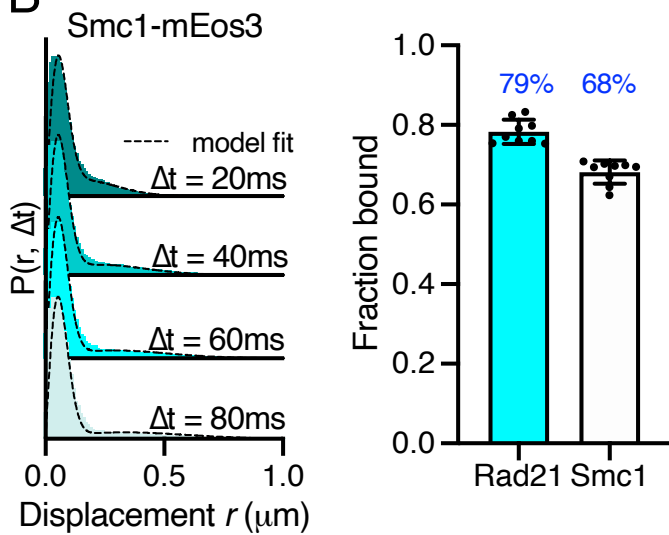

Supplement: supp [file elife-68579-supp-v1.zip]

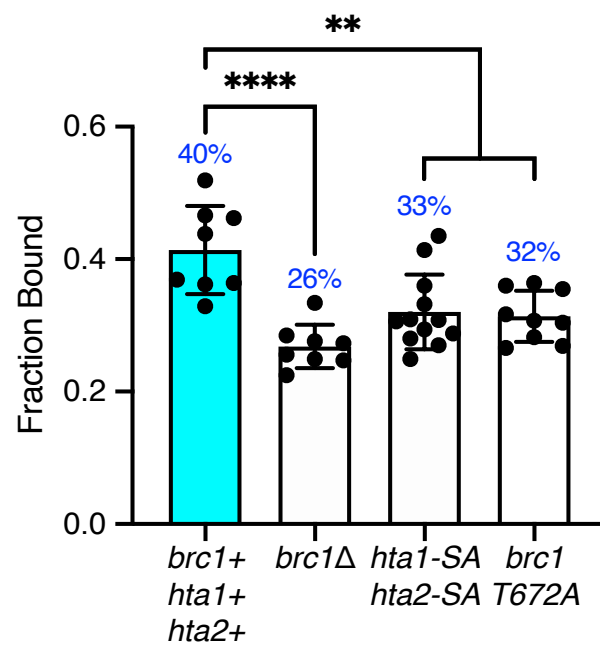

Supplement: supp [file elife-68579-supp-v1.zip]

**A**

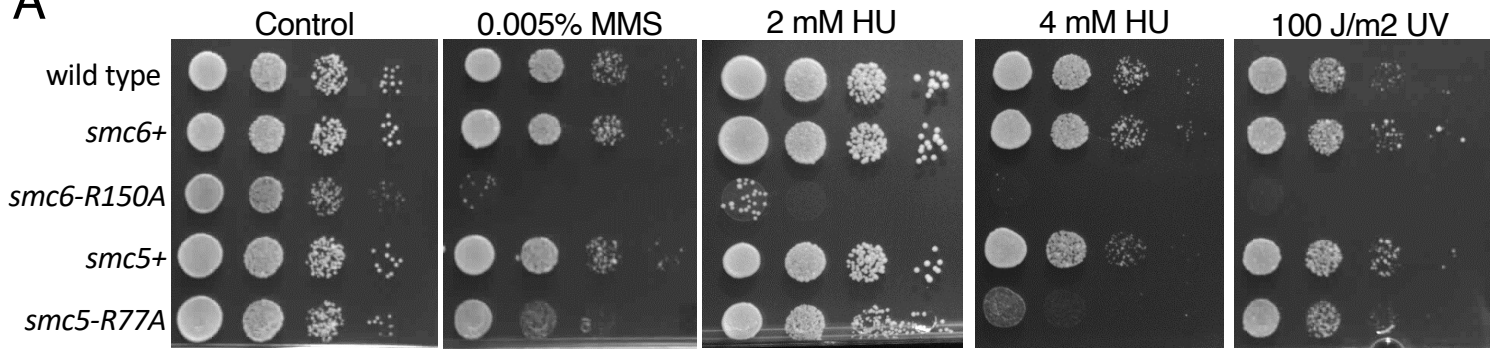

**B**

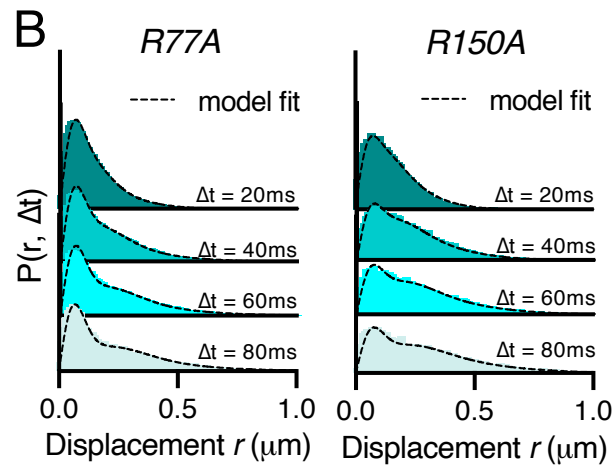

**C**

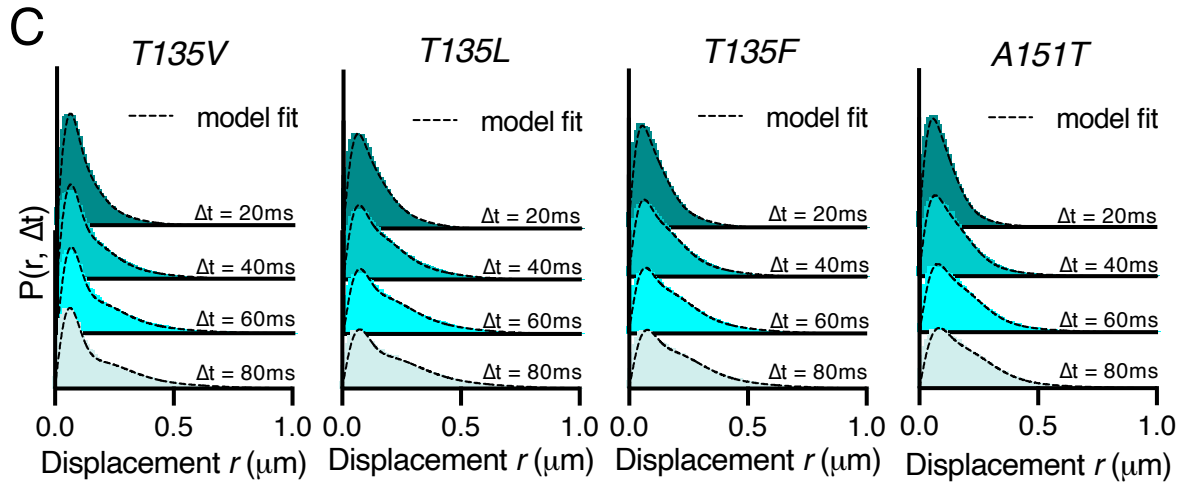

Supplement: supp [file elife-68579-supp-v1.zip]

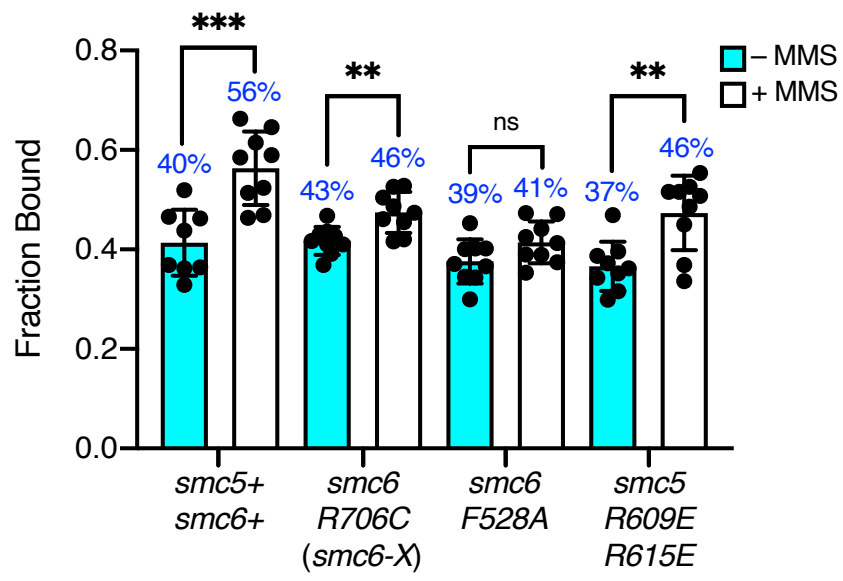

Supplement: supp [file elife-68579-supp-v1.zip]

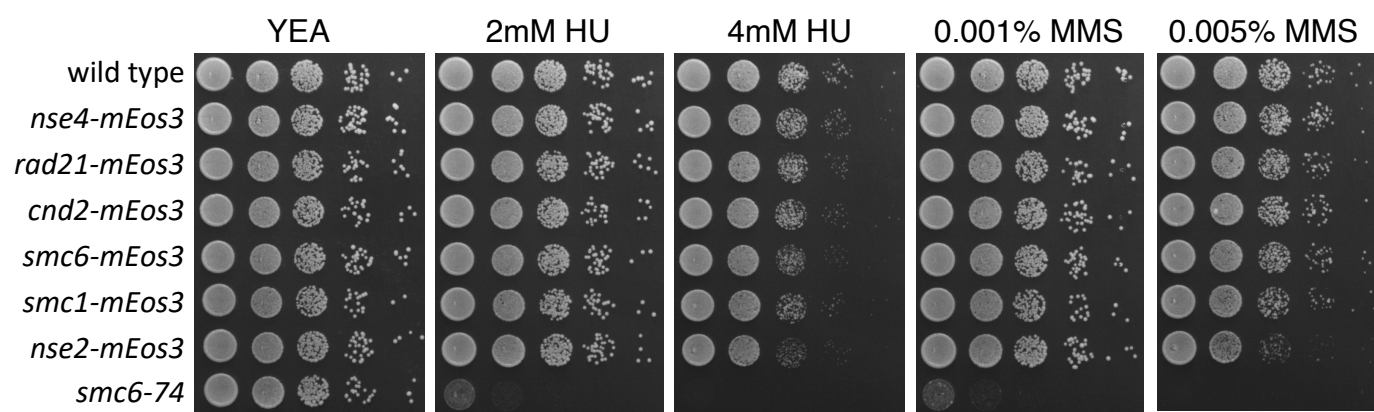

Supplement: supp [file elife-68579-supp-v1.zip]
